# Supplementary material for: Multiple sensors provide spatiotemporal oxygen regulation of gene expression in a Rhizobium-legume symbiosis
Source: PubMed Central journal article supplement (PMC7888657; doi:10.1371/journal.pgen.1009099), 2021-02-04
Supplement: pgen.1009099.s005.pdf [file pgen.1009099.s005.pdf]

A multi-sensor system provides spatiotemporal oxygen regulation of  
gene expression in a *Rhizobium*-legume symbiosis

**Supplementary Text 2: Strains, plasmids and primers used in the study**

## 1. Strains

### 1.1. *Escherichia coli*

| Name         | Relevant characteristics                                                                                                                                                                                            | Source                      |
|--------------|---------------------------------------------------------------------------------------------------------------------------------------------------------------------------------------------------------------------|-----------------------------|
| DH5 $\alpha$ | F supE44 lacU169 hsdR17 recA1 endA1 gyrA96 thi-1 relA1 (80lacZM15)                                                                                                                                                  | Hanahan 1983 [1]            |
| EC100D pir+  | F <sup>-</sup> mcrA $\Delta$ (mrr-hsdRMS-mcrBC) $\phi$ 80dlacZ $\Delta$ M15 $\Delta$ lacX74 recA1 endA1 araD139 $\Delta$ (ara, leu)7697 galU galK $\lambda$ - rpsL (Str <sup>R</sup> ) nupG pir <sup>+</sup> (DHFR) | Lucigen (Epicentre)         |
| ST18         | S17-1 $\Delta$ hemA thi pro hsdR-M-chromosomal integrated [RP4-2 Tc::Mu:Kmr::Tn7, Tra+ Trir Str <sup>R</sup> ]                                                                                                      | Thoma and Schobert 2009 [2] |
| OneShot PIR1 | F- $\Delta$ lac169 rpoS(Am) robA1 creC510 hsdR514 endA recA1 uidA( $\Delta$ Mlul)::pir-116                                                                                                                          | ThermoFisher (Invitrogen)   |

### 1.2. *Rhizobium leguminosarum* bv. 3841

| Name    | Relevant characteristics                                                                                                                                 | Source                   |
|---------|----------------------------------------------------------------------------------------------------------------------------------------------------------|--------------------------|
| D5250   | WT + pIJ11282 ( <i>Pneo:luxCDABE</i> in pIJ11268 backbone, lux positive control)                                                                         | Frederix et al. 2014 [3] |
| LMB403  | <i>hfixL<sub>c</sub></i> :pK19 single crossover                                                                                                          | This study               |
| LMB495  | <i>hfixL<sub>9</sub></i> :: $\Omega$ Spec                                                                                                                | This study               |
| LMB496  | <i>hfixL<sub>9</sub></i> :: $\Omega$ Spec <i>hfixL<sub>c</sub></i> :pK19                                                                                 | This study               |
| LMB542  | WT + pIJ11268 (promoterless <i>luxCDABE</i> , lux negative control)                                                                                      | Frederix et al. 2014 [3] |
| LMB648  | <i>fnrN</i> :: $\Omega$ Tet                                                                                                                              | This study               |
| LMB673  | <i>hfixL<sub>9</sub></i> :: $\Omega$ Spec <i>hfixL<sub>c</sub></i> :pK19 <i>fnrN</i> :: $\Omega$ Tet                                                     | This study               |
| OPS0376 | WT ( <i>hfixL<sub>9</sub></i> :: $\Omega$ Spec <i>hfixL<sub>c</sub></i> :pK19) + pOPS0136 ( <i>PfixK<sub>9a</sub>:luxCDABE</i> in pIJ11268 backbone)     | This study               |
| OPS0528 | LMB496 ( <i>hfixL<sub>9</sub></i> :: $\Omega$ Spec <i>hfixL<sub>c</sub></i> :pK19) + pOPS0136 ( <i>PfixK<sub>9a</sub>:luxCDABE</i> in pIJ11268 backbone) | This study               |
| OPS1267 | WT + pOPS0978 ( <i>PfixNOQP<sub>9</sub>:syfp2</i> in pOPS0786 backbone)                                                                                  | This study               |
| OPS1268 | WT + pOPS0979 ( <i>PnifH:syfp2</i> in pOPS0786 backbone)                                                                                                 | This study               |

|         |                                                                                                                                                                |            |
|---------|----------------------------------------------------------------------------------------------------------------------------------------------------------------|------------|
| OPS1269 | WT +<br>pOPS0980 ( <i>PfnrN</i> in pOPS0786 backbone)                                                                                                          | This study |
| OPS1274 | LMB648 ( <i>fnrN::ΩTet</i> ) +<br>pOPS0977 ( <i>PfixNOQP</i> <sub>10</sub> : <i>syfp2</i> in pOPS0786 backbone)                                                | This study |
| OPS1275 | LMB648 ( <i>fnrN::ΩTet</i> ) +<br>pOPS0978 ( <i>PfixNOQP</i> <sub>9</sub> : <i>syfp2</i> in pOPS0786 backbone)                                                 | This study |
| OPS1277 | LMB648 ( <i>fnrN::ΩTet</i> ) +<br>pOPS0980 ( <i>PfnrN</i> in pOPS0786 backbone)                                                                                | This study |
| OPS1278 | LMB496 ( <i>hfixL</i> <sub>9</sub> : <i>ΩSpec hfixL</i> <sub>c</sub> :pK19) +<br>pOPS0977 ( <i>PfixNOQP</i> <sub>10</sub> : <i>syfp2</i> in pOPS0786 backbone) | This study |
| OPS1279 | LMB496 ( <i>hfixL</i> <sub>9</sub> : <i>ΩSpec hfixL</i> <sub>c</sub> :pK19) +<br>pOPS0978 ( <i>PfixNOQP</i> <sub>9</sub> : <i>syfp2</i> in pOPS0786 backbone)  | This study |
| OPS1281 | LMB496 ( <i>hfixL</i> <sub>9</sub> : <i>ΩSpec hfixL</i> <sub>c</sub> :pK19) +<br>pOPS0980 ( <i>PfnrN</i> in pOPS0786 backbone)                                 | This study |
| OPS1287 | WT +<br>pOPS0977 ( <i>PfixNOQP</i> <sub>10</sub> : <i>syfp2</i> in pOPS0786 backbone)                                                                          | This study |
| OPS1294 | WT +<br>pOPS0785 (J23106: <i>syfp2</i> in pOPS0786 backbone, <i>syfp2</i><br>positive control)                                                                 | This study |
| OPS1295 | WT +<br>pOPS0786 (Promoterless <i>syfp2</i> in pOPS0786 backbone, <i>syfp2</i><br>negative control)                                                            | This study |
| OPS1563 | LMB403 ( <i>hfixL</i> <sub>c</sub> :pK19 single crossover) +<br>pOPS0980 ( <i>PfnrN</i> in pOPS0786 backbone)                                                  | This study |
| OPS1565 | LMB495 ( <i>hfixL</i> <sub>9</sub> : <i>ΩSpec</i> ) +<br>pOPS0980 ( <i>PfnrN</i> in pOPS0786 backbone)                                                         | This study |
| OPS1573 | LMB403 ( <i>hfixL</i> <sub>c</sub> :pK19 single crossover) +<br>pOPS0977 ( <i>PfixNOQP</i> <sub>10</sub> : <i>syfp2</i> in pOPS0786 backbone)                  | This study |
| OPS1574 | LMB403 ( <i>hfixL</i> <sub>c</sub> :pK19 single crossover) +<br>pOPS0978 ( <i>PfixNOQP</i> <sub>9</sub> : <i>syfp2</i> in pOPS0786 backbone)                   | This study |
| OPS1575 | LMB495 ( <i>hfixL</i> <sub>9</sub> : <i>ΩSpec</i> ) +<br>pOPS0977 ( <i>PfixNOQP</i> <sub>10</sub> : <i>syfp2</i> in pOPS0786 backbone)                         | This study |
| OPS1576 | LMB495 ( <i>hfixL</i> <sub>9</sub> : <i>ΩSpec</i> ) +<br>pOPS0978 ( <i>PfixNOQP</i> <sub>9</sub> : <i>syfp2</i> in pOPS0786 backbone)                          | This study |
| OPS1808 | $\Delta$ <i>fxkR</i> <sub>9</sub>                                                                                                                              | This study |
| OPS1811 | OPS1808 ( $\Delta$ <i>fxkR</i> <sub>9</sub> ) +<br>pOPS0977 ( <i>PfixNOQP</i> <sub>10</sub> : <i>syfp2</i> in pOPS0786 backbone)                               | This study |
| OPS1812 | OPS1808 ( $\Delta$ <i>fxkR</i> <sub>9</sub> ) +<br>pOPS0978 ( <i>PfixNOQP</i> <sub>9</sub> : <i>syfp2</i> in pOPS0786 backbone)                                | This study |

|         |                                                                                                                                                                                            |                                      |
|---------|--------------------------------------------------------------------------------------------------------------------------------------------------------------------------------------------|--------------------------------------|
| OPS1813 | OPS1808 ( $\Delta f_xkR_9$ ) +<br>pOPS0980 ( <i>PfnrN</i> in pOPS0786 backbone)                                                                                                            | This study                           |
| OPS2260 | LMB648 ( <i>fnrN::</i> $\Omega$ Tet) +<br>pOPS1510 ( <i>Plac:fnrN</i> in pOGG280 backbone, genomically<br>integrated by Tn7)                                                               | This study                           |
| OPS2428 | WT +<br>pOPS1593 ( <i>PfixNOQP<sub>9</sub>:syfp2</i> in pOGG276 backbone,<br>genomically integrated by Tn7)                                                                                | This study                           |
| OPS2429 | WT +<br>pOPS1594 ( <i>PfnrN:syfp2</i> in pOGG276 backbone, genomically<br>integrated by Tn7)                                                                                               | This study                           |
| OPS2431 | LMB648 ( <i>fnrN::</i> $\Omega$ Tet) +<br>pOPS1593 ( <i>PfixNOQP<sub>9</sub>:syfp2</i> in pOGG276 backbone,<br>genomically integrated by Tn7)                                              | This study                           |
| OPS2432 | LMB648 ( <i>fnrN::</i> $\Omega$ Tet) +<br>pOPS1594 ( <i>PfnrN:syfp2</i> in pOGG276 backbone, genomically<br>integrated by Tn7)                                                             | This study                           |
| OPS2434 | LMB496 ( <i>hfixL<sub>9</sub>::</i> $\Omega$ Spec <i>hfixL<sub>c</sub>:pK19</i> ) +<br>pOPS1593 ( <i>PfixNOQP<sub>9</sub>:syfp2</i> in pOGG276 backbone,<br>genomically integrated by Tn7) | This study                           |
| OPS2435 | LMB496 ( <i>hfixL<sub>9</sub>::</i> $\Omega$ Spec <i>hfixL<sub>c</sub>:pK19</i> ) +<br>pOPS1594 ( <i>PfnrN:syfp2</i> in pOGG276 backbone, genomically<br>integrated by Tn7)                | This study                           |
| OPS2468 | WT +<br>pOPS1644 ( <i>PfixNOQP<sub>10</sub>:syfp2</i> in pJP2 backbone)                                                                                                                    | This study                           |
| OPS2469 | LMB496 ( <i>hfixL<sub>9</sub>::</i> $\Omega$ Spec <i>hfixL<sub>c</sub>:pK19</i> ) +<br>pOPS1644 ( <i>PfixNOQP<sub>10</sub>:syfp2</i> in pJP2 backbone)                                     | This study                           |
| OPS2470 | WT +<br>pOPS1607 ( <i>J23106:syfp2</i> in pOGG276 backbone, <i>syfp2</i><br>positive control, genomically integrated by Tn7)                                                               | This study                           |
| Rlv3841 | Wild type <i>R. leguminosarum</i> bv. <i>viciae</i> 3841, Str <sup>R</sup> derivative of<br>strain Rlv300                                                                                  | Johnston<br>and Beringer<br>1975 [4] |

## 2. Plasmids

| Name          | Description                                                                                                                                            | Source                      |
|---------------|--------------------------------------------------------------------------------------------------------------------------------------------------------|-----------------------------|
| pHP45ΩSpc     | pBR322 derivative vector carrying Ω interposon spectinomycin resistance cassette, pHP45 replicon; Amp <sup>R</sup> , Spc <sup>R</sup>                  | Fellay et al. 1987 [5]      |
| pHP45ΩTet     | pBR322 derivative vector carrying Ω interposon tetracycline resistance cassette, pHP45 replicon; Amp <sup>R</sup> , Tet <sup>R</sup>                   | Fellay et al. 1987 [5]      |
| pIJ11268      | Broad host range vector based on pJP2 containing promoterless <i>luxCDABE</i> operon, used as negative control for Lux assay; Tet <sup>R</sup>         | Frederix et al. 2014 [3]    |
| pIJ11282      | pIJ11268 with neomycin promoter cloned in front of <i>luxCDABE</i> , used as positive control for Lux assay; Tet <sup>R</sup>                          | Frederix et al. 2014 [3]    |
| pJET1.2/blunt | <i>E. coli</i> vector for cloning PCR products; Amp <sup>R</sup>                                                                                       | Thermo Scientific           |
| pJP2          | Broad-host-range <i>gusA</i> transcriptional promoter probe vector; Tet <sup>R</sup> Amp <sup>R</sup>                                                  | Prell et al. 2012 [6]       |
| pJQ200SK      | Suicide vector, pACYC derivative, p15A origin of replication, <i>lacZ sacB traJ</i> ; Gent <sup>R</sup>                                                | Quandt and Hynes 1993 [7]   |
| pK19mob       | Mobilizable <i>E. coli</i> vector for integration mutagenesis ( <i>oriV</i> ), pMB1 replication, RP4 mob; Kan <sup>R</sup>                             | Schafer 1994 [8]            |
| pK19mobSacB   | Mobilizable <i>E. coli</i> vector for integration mutagenesis ( <i>oriV</i> , <i>sacB</i> ), pMB1 replication, RP4 mob; Kan <sup>R</sup>               | Kirchner and Tauch 2003 [9] |
| pLMB441       | Internal fragment of <i>hfixL<sub>c</sub></i> amplified from Rlv3841 with primers pr0988/0989, cloned into pK19mob digested with XbaI.                 | This work                   |
| pLMB581       | <i>hfixL<sub>9</sub></i> amplified from Rlv3841 with pr1270/1271 cloned into pJET1/2/blunt                                                             | This work                   |
| pLMB585       | <i>hfixL<sub>9</sub></i> digested out of pLMB581 with XbaI/XhoI cloned into pJQ200SK, digested with XbaI/XhoI.                                         | This work                   |
| pLMB590       | ΩSpc from SmaI digested pHP45ΩSpc cloned into pLMB585 digested with StuI (blunted); Gent <sup>R</sup> Spc <sup>R</sup>                                 | This work                   |
| pLMB732       | Rlv3841 <i>fnrN</i> amplified with primers pr1381/1382 cloned into pJQ200SK at XbaI/XhoI site.                                                         | This work                   |
| pLMB733       | ΩTet from EcoRI digested pHP45ΩTet cloned into pLMB732 digested with MfeI; Gent <sup>R</sup> Tet <sup>R</sup>                                          | This work                   |
| pOGG276       | Mobilizable vector for hosting sequences to be genomically inserted via mini-Tn7. R6Ky; Gent <sup>R</sup> (genomic insert) Amp <sup>R</sup> (backbone) | This work                   |
| pOGG280       | Mobilizable vector for hosting sequences to be genomically inserted via mini-Tn7. R6Ky; Kan <sup>R</sup> (genomic insert) Amp <sup>R</sup> (backbone)  | This work                   |
| pOPS0136      | <i>PfixK<sub>9a</sub></i> amplified from Rlv3841 with oxp0287/0288 cloned into pIJ11268 digested with BamHI/KpnI                                       | This work                   |

|          |                                                                                                                                                                                                                                                      |                        |
|----------|------------------------------------------------------------------------------------------------------------------------------------------------------------------------------------------------------------------------------------------------------|------------------------|
| pOPS0785 | Reporter plasmid backbone with an MCS for fusing promoters to <i>mruby3</i> . Constitutive <i>syfp2</i> expression, used as positive control for <i>in-vitro</i> fluorescence assays. Contains <i>parABCDE</i> stability system. Gent <sup>R</sup> . | This work              |
| pOPS0786 | Reporter plasmid backbone with an MCS for fusing promoters to <i>syfp2</i> . Constitutive <i>mruby3</i> expression. Contains <i>parABCDE</i> stability system. Used as negative control for <i>in-vitro</i> fluorescence assays. Gent <sup>R</sup> . | This work              |
| pOPS0977 | <i>PfixNOQP</i> <sub>10</sub> amplified from Rlv3841 with primers <i>oxp3039/3040</i> cloned into pOPS0786 digested with KpnI.                                                                                                                       | This work              |
| pOPS0978 | <i>PfixNOQP</i> <sub>9</sub> amplified from Rlv3841 with primers <i>oxp3041/3042</i> cloned into pOPS0786 digested with KpnI.                                                                                                                        | This work              |
| pOPS0979 | <i>PnifH</i> amplified from Rlv3841 with primers <i>oxp3043/3044</i> cloned into pOPS0786 digested with KpnI.                                                                                                                                        | This work              |
| pOPS0980 | <i>PfnrN</i> amplified from Rlv3841 with primers <i>oxp3045/3046</i> cloned into pOPS0786 digested with KpnI.                                                                                                                                        | This work              |
| pOPS1199 | Fragments upstream ( <i>oxp2874/2875</i> ) and downstream ( <i>oxp2876/oxp2877</i> ) of <i>fxkR</i> <sub>9</sub> amplified from Rlv3841 and cloned into pK19mobSacB digested with HindIII and EcoRI, used to make the markerless mutant.             | This work              |
| pOPS1510 | Rlv3841 <i>fnrN</i> gene amplified with <i>oxp4115/4116</i> cloned into pOGG280 digested with Bsal.                                                                                                                                                  | This work              |
| pOPS1593 | <i>PfixNOQP</i> <sub>9</sub> fused to <i>syfp2</i> amplified from pOPS0978 with primers <i>oxp4354/4355</i> cloned into pOGG276 digested with XbaI.                                                                                                  | This work              |
| pOPS1594 | <i>PfnrN</i> fused to <i>syfp2</i> amplified from pOPS0978 with primers <i>oxp4354/4355</i> cloned into pOGG276 digested with XbaI.                                                                                                                  | This work              |
| pOPS1607 | Reporter plasmid assembled into the pOGG276 backbone by Golden Gate assembly: J23106 promoter, RBStd, <i>syfp2</i> , DT16 terminator.                                                                                                                | This work              |
| pOPS1644 | pJP2 digested with HindIII and XbaI to remove <i>gfp</i> reporter, replaced with Rlv3841 <i>PfixNOQP</i> <sub>10</sub> fused to <i>syfp2</i> , amplified from pOPS0977 with <i>oxp4550/4551</i> ; Tet <sup>R</sup> Amp <sup>R</sup>                  | This work              |
| pTNS3    | <i>E. coli</i> vector expressing <i>tnsABCD</i> from PI and lac promoters. Enables Tn7 insertions at the <i>glmS</i> site; Amp <sup>R</sup>                                                                                                          | Choi et al. 2008 [10]  |
| pRK2013  | Helper plasmid; mob <sup>+</sup> , Kan <sup>R</sup>                                                                                                                                                                                                  | Ditta et al. 1980 [11] |

### 3. Primers

| Name    | Description                                                                                                                | Sequence (5'-3')                                       |
|---------|----------------------------------------------------------------------------------------------------------------------------|--------------------------------------------------------|
| oxp0283 | Forward mapping primer for pOPS0786-based reporter plasmids                                                                | AGCGTTCTGAACAAATCC                                     |
| oxp1331 | Reverse mapping primer for pOPS0786-based reporter plasmids                                                                | TTTTGAAGACAAAAGCTTATT<br>ATTTATACAGCTCATCCATAC<br>CCAG |
| oxp0287 | Forward primer for amplification of Rlv3841 <i>PfixK<sub>9a</sub></i> for cloning into pIJ11268                            | TTTTGGTACCGATGTCGTCCC<br>CAGTG                         |
| oxp0288 | Reverse primer for amplification of Rlv3841 <i>PfixK<sub>9a</sub></i> for cloning into pIJ11268                            | AAAAGGATCCTGGAACGCCT<br>CTGC                           |
| oxp2327 | Forward mapping primer for Tn7 integrations into Rlv3841                                                                   | GATGATCTTCTCGCTGCCGA                                   |
| oxp2328 | Reverse mapping primer for Tn7 integrations into Rlv3841                                                                   | GCTCTGGCCAATGAGGTTCT                                   |
| oxp2874 | Forward for amplicon upstream of <i>fxkR<sub>9</sub></i> , for cloning into pK19mobSacB and markerless mutant generation   | GTCGACTCTAGAGGATCCCCT<br>TCGGGATCATTGGCGCTG            |
| oxp2875 | Reverse for amplicon upstream of <i>fxkR<sub>9</sub></i> , for cloning into pK19mobSacB and markerless mutant generation   | CGGTGAAGACGTAGCAGTAC<br>TCGTCCTCGAAATAGCGCGTC<br>AG    |
| oxp2876 | Forward for amplicon downstream of <i>fxkR<sub>9</sub></i> , for cloning into pK19mobSacB and markerless mutant generation | GCTATTTTCGAGGACGAGTACT<br>GCTACGTCTTACC GCCAG          |
| oxp2877 | Reverse for amplicon downstream of <i>fxkR<sub>9</sub></i> , for cloning into pK19mobSacB and markerless mutant generation | TGAATTCGAGCTCGGTACCCT<br>CTTCGGACAGCACATTGAG           |
| oxp3039 | Reverse primer for amplification of <i>PfixNOQP<sub>10</sub></i> from Rlv3841 for cloning into pOPS0786                    | CTTGCTAACCATTTGGATGTC<br>GTCCCCAGTACGCC                |
| oxp3040 | Forward primer for amplification of <i>PfixNOQP<sub>10</sub></i> from Rlv3841 for cloning into pOPS0786                    | GTGGAGATCTAGAAGTTACG<br>GCGGCCGCGACAGC                 |
| oxp3041 | Forward primer for amplification of <i>PfixNOQP<sub>9</sub></i> from Rlv3841 for cloning into pOPS0786                     | CTTGCTAACCATTTGGATGTC<br>GTCCCCAGTGCG                  |
| oxp3042 | Reverse primer for amplification of <i>PfixNOQP<sub>9</sub></i> from Rlv3841 for cloning into pOPS0786                     | GTGGAGATCTAGAAGTGGAA<br>CGCCTCTGCGTCAC                 |
| oxp3043 | Forward primer for amplification of <i>PnifH</i> from Rlv3841 for cloning into pOPS0786                                    | CTTGCTAACCATTTGGTTTGGC<br>GTTCCCTCATGTGTTT             |
| oxp3044 | Reverse primer for amplification of <i>PnifH</i> from Rlv3841 for cloning into pOPS0786                                    | GTGGAGATCTAGAAGTCGAT<br>GCTGACCGCCTGATC                |
| oxp3045 | Reverse primer for amplification of <i>PfnrN</i> from Rlv3841 for cloning into pOPS0786                                    | CTTGCTAACCATTTGGTCCTG<br>ATCCCTTTTGAATCCT              |
| oxp3046 | Forward primer for amplification of <i>PfnrN</i> from Rlv3841 for cloning into pOPS0786                                    | GTGGAGATCTAGAAGGCGCT<br>GTACCTCATGAAAT                 |
| oxp3062 | Forward mapping primer for pOGG280                                                                                         | GAGCGCTTTTGAAGCTAATTC<br>GA                            |

|         |                                                                                                                 |                                                         |
|---------|-----------------------------------------------------------------------------------------------------------------|---------------------------------------------------------|
| oxp3063 | Reverse mapping primer for pOGG280                                                                              | TCACTTATCTGGTTGGCCTGC                                   |
| oxp3115 | Forward mapping primer for <i>fxkR</i> <sub>9</sub> mutagenesis                                                 | GGTCGTTGTCTCCAGGCGCG                                    |
| oxp3156 | Reverse mapping primer for <i>fxkR</i> <sub>9</sub> mutagenesis                                                 | TGCGCAGTGGTTGGCTAGGC                                    |
| oxp4115 | Forward primer for amplification of Rlv3841 <i>fnrN</i> gene for cloning into pOGG280                           | TAATGCCGAATTCGGATCCCG<br>CGCTGTACCTCATGAAATG            |
| oxp4116 | Reverse primer for amplification of Rlv3841 <i>fnrN</i> gene for cloning into pOGG280                           | CTATCAACAGGAGTCCAAGTA<br>TGCGCTGATCATCCGCTC             |
| oxp4354 | Forward primer for amplification of Rlv3841 promoters fused to <i>syfp2</i> in pOPS0786                         | AATTCGGATCCGGAGTCGGTC<br>ACATGTGCATC                    |
| oxp4355 | Reverse primer for amplification of Rlv3841 promoters fused to <i>syfp2</i> in pOPS0786                         | AGGAGTCCAAGAGCGGGTCCG<br>AAAAAAAAAAGCCCG                |
| oxp4550 | Forward primer for amplification of PfixNOQP <sub>10</sub> fused to <i>syfp2</i> from pOPS0977                  | GTCCGGGTACCATGGATCCAT<br>TACGGCGGCCGCGACAG              |
| oxp4551 | Reverse primer for amplification of PfixNOQP <sub>10</sub> fused to <i>syfp2</i> from pOPS0977                  | CGGACCATGATTACCTCAGTG<br>GTCGAAAAAAAAAAGCCCGCA<br>CTGTC |
| pK19A   | Reverse mapping primer for <i>hfixL<sub>c</sub></i> mutagenesis, binds in pK19mob                               | ATCAGATCTTGATCCCCTGC                                    |
| pr0482  | Forward mapping primer for <i>hfixL<sub>c</sub></i> mutagenesis, binds in genome                                | AGTTCGATGTTTCGTATCCGAA<br>C                             |
| pr0988  | Forward primer for amplification of Rlv3841 <i>hfixL<sub>c</sub></i> internal fragment for cloning into pK19mob | GCAGGTCGACTCTAGATGGA<br>AGAGCTTCGGACCGAA                |
| pr0989  | Reverse primer for amplification of Rlv3841 <i>hfixL<sub>c</sub></i> internal fragment for cloning into pK19mob | CCGGGGATCCTCTAGAATATC<br>TCGATCGTCAGACGG                |
| pr1270  | Forward primer for amplification of Rlv3841 <i>hfixL<sub>9</sub></i> for cloning into pJQ200SK                  | CTCGAGGCTACATCGACCACT<br>ATCTC                          |
| pr1271  | Reverse primer for amplification of Rlv3841 <i>hfixL<sub>9</sub></i> for cloning into pJQ200SK                  | TCTAGAACACGGGCGTCATCT<br>TCGAC                          |
| pr1272  | Forward mapping primer for <i>hfixL<sub>9</sub></i> mutagenesis                                                 | CGGAAGAGCTTCCACGATGA                                    |
| pr1273  | Reverse mapping primer for <i>hfixL<sub>9</sub></i> mutagenesis                                                 | GCCGTCCGCACCTGTCGTTC                                    |
| pr1381  | Forward primer for amplification of Rlv3841 <i>fnrN</i> gene for cloning into pJQ200SK                          | GCCTAAAGCGCGTCTGGTTC                                    |
| pr1382  | Reverse primer for amplification of Rlv3841 <i>fnrN</i> gene for cloning into pJQ200SK                          | AATAAGCCTGCGGCGCATCC                                    |
| pr1432  | Forward mapping primer for <i>fnrN</i> mutagenesis                                                              | CTGGGCCATGGTCTCGATCA                                    |
| pr1433  | Reverse mapping primer for <i>fnrN</i> mutagenesis                                                              | CATAATCTCGGCACCATGGC                                    |

## References

1. Hanahan D. Studies on transformation of *Escherichia coli* with plasmids. *J Mol Biol.* 1983;166: 557–580. doi:10.1016/S0022-2836(83)80284-8
2. Thoma S, Schobert M. An improved *Escherichia coli* donor strain for diparental mating. *FEMS Microbiol Lett.* 2009;294: 127–132. doi:10.1111/j.1574-6968.2009.01556.x
3. Frederix M, Edwards A, Swiderska A, Stanger A, Karunakaran R, Williams A, et al. Mutation of *praR* in *Rhizobium leguminosarum* enhances root biofilms, improving nodulation competitiveness by increased expression of attachment proteins. *Mol Microbiol.* 2014;93: 464–478. doi:10.1111/mmi.12670
4. Johnston AWB, Behringer JE. Identification of the *Rhizobium* strains in pea root nodules using genetic markers. *J Gen Microbiol.* 1975;87: 343–350. doi:10.1099/00221287-87-2-343
5. Fellay R, Frey J, Krisch H. Interposon mutagenesis of soil and water bacteria: a family of DNA fragments designed for in vitro insertional mutagenesis of Gram-negative bacteria. *Gene.* 1987;52: 147–154. doi:10.1016/0378-1119(87)90041-2
6. Prell J, Mulley G, Haufe F, White JP, Williams A, Karunakaran R, et al. The PTS Ntr system globally regulates ATP-dependent transporters in *Rhizobium leguminosarum*. *Mol Microbiol.* 2012;84: 117–129. doi:10.1111/j.1365-2958.2012.08014.x
7. Quandt J, Hynes MF. Versatile suicide vectors which allow direct selection for gene replacement in Gram-negative bacteria. *Gene.* 1993;127: 15–21. doi:10.1016/0378-1119(93)90611-6
8. Schäfer A, Tauch A, Jäger W, Kalinowski J, Thierbach G, Pühler A. Small mobilizable multi-purpose cloning vectors derived from the *Escherichia coli* plasmids pK18 and pK19: selection of defined deletions in the chromosome of *Corynebacterium glutamicum*. *Gene.* 1994;145: 69–73. doi:10.1016/0378-1119(94)90324-7
9. Kirchner O, Tauch A. Tools for genetic engineering in the amino acid-producing bacterium *Corynebacterium glutamicum*. *J Biotechnol.* 2003;104: 287–299. doi:10.1016/S0168-1656(03)00148-2
10. Choi KH, Mima T, Casart Y, Rholl D, Kumar A, Beacham IR, et al. Genetic tools for select-agent-compliant manipulation of *Burkholderia pseudomallei*. *Appl Environ Microbiol.* 2008;74: 1064–1075. doi:10.1128/AEM.02430-07
11. Ditta G, Stanfield S, Corbin D, Helinski DR. Broad host range DNA cloning system for Gram-negative bacteria: construction of a gene bank of *Rhizobium meliloti*. *Proc Natl Acad Sci.* 1980;77: 7347–7351. doi:10.1073/pnas.77.12.7347
