# Supplementary material for: Multiple sensors provide spatiotemporal oxygen regulation of gene expression in a Rhizobium-legume symbiosis
Source: PubMed Central journal article supplement (PMC7888657; doi:10.1371/journal.pgen.1009099), 2021-02-04
Supplement: pgen.1009099.s007.pdf [file pgen.1009099.s007.pdf]

A multi-sensor system provides spatiotemporal oxygen regulation of  
gene expression in a *Rhizobium*-legume symbiosis

**Supplementary Text 4: Data tables for main text figures 2-5 and  
supplementary figures S1, S2**

Figure 2

All values given as Fluo/OD<sub>600</sub>.

| <b>21% O<sub>2</sub></b> |                             |                              |              |              |
|--------------------------|-----------------------------|------------------------------|--------------|--------------|
| Replicate no.            | <i>PfixNOQP<sub>9</sub></i> | <i>PfixNOQP<sub>10</sub></i> | <i>PfnrN</i> | <i>PnifH</i> |
| 1                        | 1157                        | 1438                         | 8009         | 3500         |
| 2                        | 1025                        | 1212                         | 10446        | 1934         |
| 3                        | 1001                        | 1282                         | 4173         | 3447         |

| <b>1% O<sub>2</sub></b> |                             |                              |              |              |
|-------------------------|-----------------------------|------------------------------|--------------|--------------|
| Replicate no.           | <i>PfixNOQP<sub>9</sub></i> | <i>PfixNOQP<sub>10</sub></i> | <i>PfnrN</i> | <i>PnifH</i> |
| 1                       | 5504                        | 6924                         | 105397       | 4207         |
| 2                       | 5906                        | 6997                         | 116921       | 4362         |
| 3                       | 5090                        | 6870                         | 84631        | 3923         |

Figure 3

All values given as % of the WT average for each respective promoter (columns).

| <b>WT</b>     |                             |                              |              |
|---------------|-----------------------------|------------------------------|--------------|
| Replicate no. | <i>PfixNOQP<sub>9</sub></i> | <i>PfixNOQP<sub>10</sub></i> | <i>PfnrN</i> |
| 1             | 113                         | 95                           | 103          |
| 2             | 87                          | 105                          | 97           |
| 3             | 107                         | 115                          | 112          |
| 4             | 93                          | 85                           | 88           |
| 5             | 82                          | 97                           | 92           |
| 6             | 118                         | 103                          | 108          |
| 7             | 87                          | 84                           | 82           |
| 8             | 113                         | 116                          | 118          |
| 9             | 84                          | 92                           | -            |
| 10            | 116                         | 108                          | -            |
| 11            | 98                          | 96                           | -            |
| 12            | 102                         | 104                          | -            |

| <b><i>hfixL<sub>9</sub> hfixL<sub>c</sub></i> (LMB496)</b> |                             |                              |              |
|------------------------------------------------------------|-----------------------------|------------------------------|--------------|
| Replicate no.                                              | <i>PfixNOQP<sub>9</sub></i> | <i>PfixNOQP<sub>10</sub></i> | <i>PfnrN</i> |
| 1                                                          | 22                          | 4                            | 32           |
| 2                                                          | 20                          | 3                            | 25           |
| 3                                                          | 14                          | 3                            | 26           |
| 4                                                          | 13                          | 3                            | 18           |

| <b><i>hfixL<sub>9</sub></i> (LMB495)</b> |                             |                              |              |
|------------------------------------------|-----------------------------|------------------------------|--------------|
| Replicate no.                            | <i>PfixNOQP<sub>9</sub></i> | <i>PfixNOQP<sub>10</sub></i> | <i>PfnrN</i> |
| 1                                        | 28                          | 14                           | 43           |
| 2                                        | 24                          | 12                           | 31           |
| 3                                        | 18                          | 12                           | 34           |
| 4                                        | 14                          | 12                           | 22           |

| <b><i>hfixL<sub>c</sub></i> (LMB403)</b> |                             |                              |              |
|------------------------------------------|-----------------------------|------------------------------|--------------|
| Replicate no.                            | <i>PfixNOQP<sub>9</sub></i> | <i>PfixNOQP<sub>10</sub></i> | <i>PfnrN</i> |
| 1                                        | 109                         | 137                          | 175          |
| 2                                        | 87                          | 112                          | 115          |
| 3                                        | 48                          | 106                          | 154          |
| 4                                        | 42                          | 110                          | 123          |

Figure 3 data continues on next page.

Figure 3 (continued)

All values given as % of the WT average for each respective promoter (columns).

| <b><i>fxkR</i><sub>9</sub> (OPS1808)</b> |                              |                               |              |
|------------------------------------------|------------------------------|-------------------------------|--------------|
| Replicate no.                            | <i>PfixNOQP</i> <sub>9</sub> | <i>PfixNOQP</i> <sub>10</sub> | <i>PfnrN</i> |
| 1                                        | 21                           | 18                            | 4            |
| 2                                        | 13                           | 13                            | 3            |
| 3                                        | 18                           | 17                            | 5            |
| 4                                        | 14                           | 15                            | 2            |
| 5                                        | 37                           | 26                            | -            |
| 6                                        | 21                           | 19                            | -            |
| 7                                        | 30                           | 29                            | -            |
| 8                                        | 23                           | 21                            | -            |

| <b><i>fnrN</i> (LMB648)</b> |                              |                               |              |
|-----------------------------|------------------------------|-------------------------------|--------------|
| Replicate no.               | <i>PfixNOQP</i> <sub>9</sub> | <i>PfixNOQP</i> <sub>10</sub> | <i>PfnrN</i> |
| 1                           | 73                           | 99                            | 114          |
| 2                           | 76                           | 90                            | 99           |
| 3                           | 80                           | 83                            | 106          |
| 4                           | 62                           | 80                            | 96           |

Figure 4

All values given as Fluo/OD<sub>600</sub>.

| <b><i>PfnrN</i> (A)</b> |       |                      |                                                     |
|-------------------------|-------|----------------------|-----------------------------------------------------|
| Replicate no.           | WT    | <i>fnrN</i> (LMB648) | <i>hfixL<sub>9</sub> hfixL<sub>c</sub></i> (LMB496) |
| 1                       | 13040 | 1413                 | 4394                                                |
| 2                       | 7306  | 2868                 | 2014                                                |
| 3                       | 12329 | 1653                 | 4897                                                |
| 4                       | 13772 | 2800                 | 1616                                                |
| 5                       | -     | 4324                 | 3538                                                |

| <b><i>PfixNOQP<sub>9</sub></i> (B)</b> |       |                      |                                                     |
|----------------------------------------|-------|----------------------|-----------------------------------------------------|
| Replicate no.                          | WT    | <i>fnrN</i> (LMB648) | <i>hfixL<sub>9</sub> hfixL<sub>c</sub></i> (LMB496) |
| 1                                      | 45572 | 1947                 | 28891                                               |
| 2                                      | 42560 | 2248                 | 29434                                               |
| 3                                      | 43104 | 2357                 | 29324                                               |
| 4                                      | 45162 | -                    | 31417                                               |
| 5                                      | -     | -                    | 32920                                               |

| <b><i>PfixNOQP<sub>10</sub></i> (C)</b> |       |                      |                                                     |
|-----------------------------------------|-------|----------------------|-----------------------------------------------------|
| Replicate no.                           | WT    | <i>fnrN</i> (LMB648) | <i>hfixL<sub>9</sub> hfixL<sub>c</sub></i> (LMB496) |
| 1                                       | 92192 | 3200                 | 58844                                               |
| 2                                       | 71749 | 4152                 | 43836                                               |
| 3                                       | 84645 | 4796                 | 50489                                               |
| 4                                       | 83645 | 4738                 | 50308                                               |
| 5                                       | 85324 | 4451                 | 40259                                               |

Figure 5

All values given as % of the WT average. Note decimals have been eliminated from all strains except LMB673 for clarity.

| Replicate no. | WT  | <i>hfixL<sub>9</sub></i><br><i>hfixL<sub>c</sub></i><br>(LMB496) | <i>fnrN</i><br>(LMB648) | <i>fxkR<sub>9</sub></i><br>(OPS1808) | <i>hfixL<sub>9</sub></i><br>(LMB495) | <i>hfixL<sub>c</sub></i><br>(LMB403) | <i>fnrN</i><br><i>hfixL<sub>9</sub></i><br><i>hfixL<sub>c</sub></i><br>(LMB673) |
|---------------|-----|------------------------------------------------------------------|-------------------------|--------------------------------------|--------------------------------------|--------------------------------------|---------------------------------------------------------------------------------|
| 1             | 113 | 79                                                               | 21                      | 76                                   | 68                                   | 42                                   | 0.179                                                                           |
| 2             | 99  | 95                                                               | 13                      | 89                                   | 69                                   | 101                                  | 0.269                                                                           |
| 3             | 105 | 71                                                               | 9                       | 66                                   | 71                                   | 85                                   | 0.269                                                                           |
| 4             | 116 | 60                                                               | 18                      | 80                                   | 60                                   | 69                                   | 0.269                                                                           |
| 5             | 112 | 66                                                               | 14                      | 90                                   | 89                                   | 73                                   | 0.179                                                                           |
| 6             | 92  | -                                                                | -                       | 68                                   | -                                    | -                                    | -                                                                               |
| 7             | 87  | -                                                                | -                       | 100                                  | -                                    | -                                    | -                                                                               |
| 8             | 76  | -                                                                | -                       | -                                    | -                                    | -                                    | -                                                                               |
| 9             | 75  | -                                                                | -                       | -                                    | -                                    | -                                    | -                                                                               |
| 10            | 103 | -                                                                | -                       | -                                    | -                                    | -                                    | -                                                                               |
| 11            | 104 | -                                                                | -                       | -                                    | -                                    | -                                    | -                                                                               |
| 12            | 117 | -                                                                | -                       | -                                    | -                                    | -                                    | -                                                                               |
| 13            | 101 | -                                                                | -                       | -                                    | -                                    | -                                    | -                                                                               |

Figure S1

All values given as Luminescence/OD<sub>600</sub>.

| Replicate no. | WT   | <i>hfixL<sub>9</sub> hfixL<sub>c</sub></i> (LMB496) | WT w/o reporter |
|---------------|------|-----------------------------------------------------|-----------------|
| 1             | 734  | 150                                                 | 526             |
| 2             | 814  | 364                                                 | 374             |
| 3             | 886  | 665                                                 | 610             |
| 4             | 1108 | 861                                                 | 430             |
| 5             | 1045 | -                                                   | 490             |

Figure S2

All values given as  $\mu\text{moles ethylene jar}^{-1} \text{ hour}^{-1} \text{ g of nodules}^{-1}$

| Replicate no. | WT     | <i>fnrN</i> (LMB648) | <i>fnrN</i> complemented (OPS2260) |
|---------------|--------|----------------------|------------------------------------|
| 1             | 14.395 | 2.783                | 15.074                             |
| 2             | 16.117 | 4.044                | 13.961                             |
| 3             | 16.371 | 2.819                | 16.040                             |
| 4             | 14.220 | 3.287                | 9.609                              |
| 5             | 16.081 | 3.193                | 14.590                             |
| 6             | 16.116 | 3.565                | 15.330                             |
| 7             | 18.392 | 2.725                | 13.298                             |
